# Supplementary material
Source: publisher site journal article supplement (https://www.dovepress.com/article/356934)
Supplement: Supplementary file 1 [file get_supplementary_file.php]

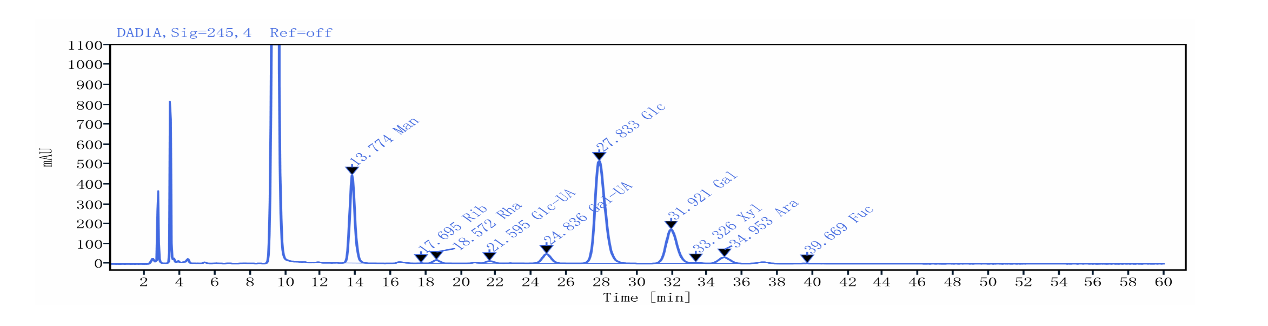
**Supplementary Materials**

**Supplementary Figure 1** HPLC chromatograms of *Anoectochilus Roxburghii (Wall.) Lindl.* Polysaccharides extract. “Man” = Mannose, “Rib” = Ribose, “Rha” = Rhamnose, “Glc-UA” = Glucuronic acid, “Gal-UA” = Galacturonic Acid, “Glc” = Glucose, “Gal” = Galactose. “Xyl” = Xylose, “Ara” = Arabinose, “Fuc” = Fucose.

**
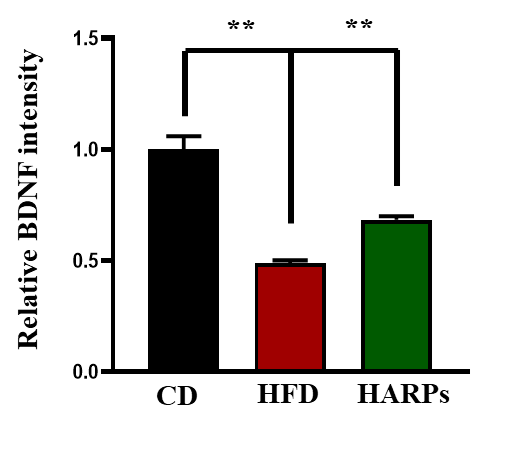
**

**Supplementary Figure 2** The quantitative evaluation of BDNF expression in hippocampal Immunofluorescence staining. Microscopy results of BDNF expression in the different experimental groups of hippocampal tissue, with respective bar graphs (n = 6). The image data were collected from three independent experiments and were analyzed by ImageJ software. The differences have been shown in the graphs. Data were expressed as mean ± SEM, one-way ANOVA followed by post hoc analysis. *p* = < 0.05 were considered significant. **p* < 0.05, ***p* < 0.01.

**
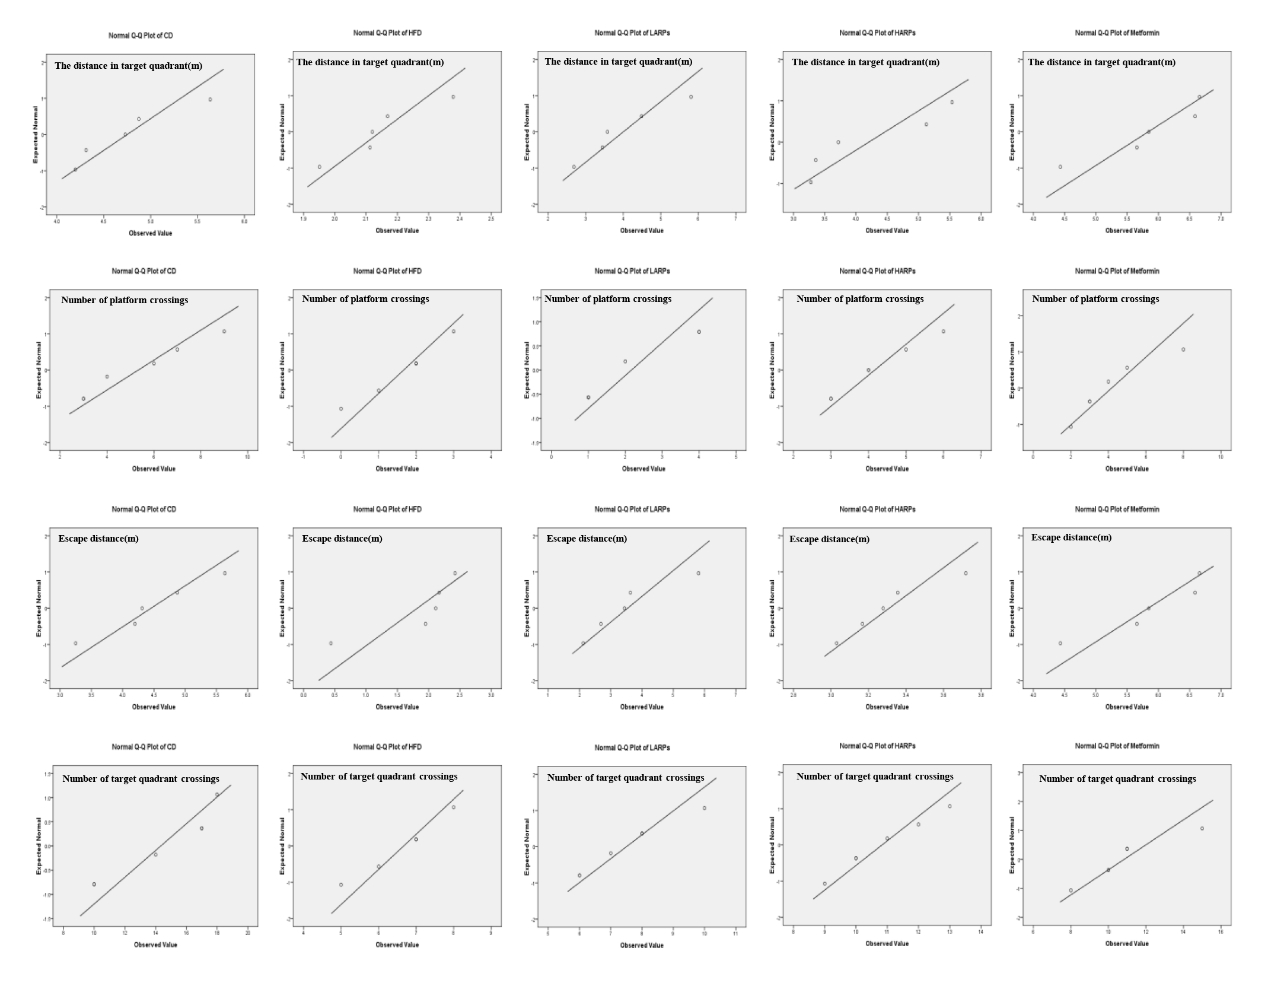
**

**
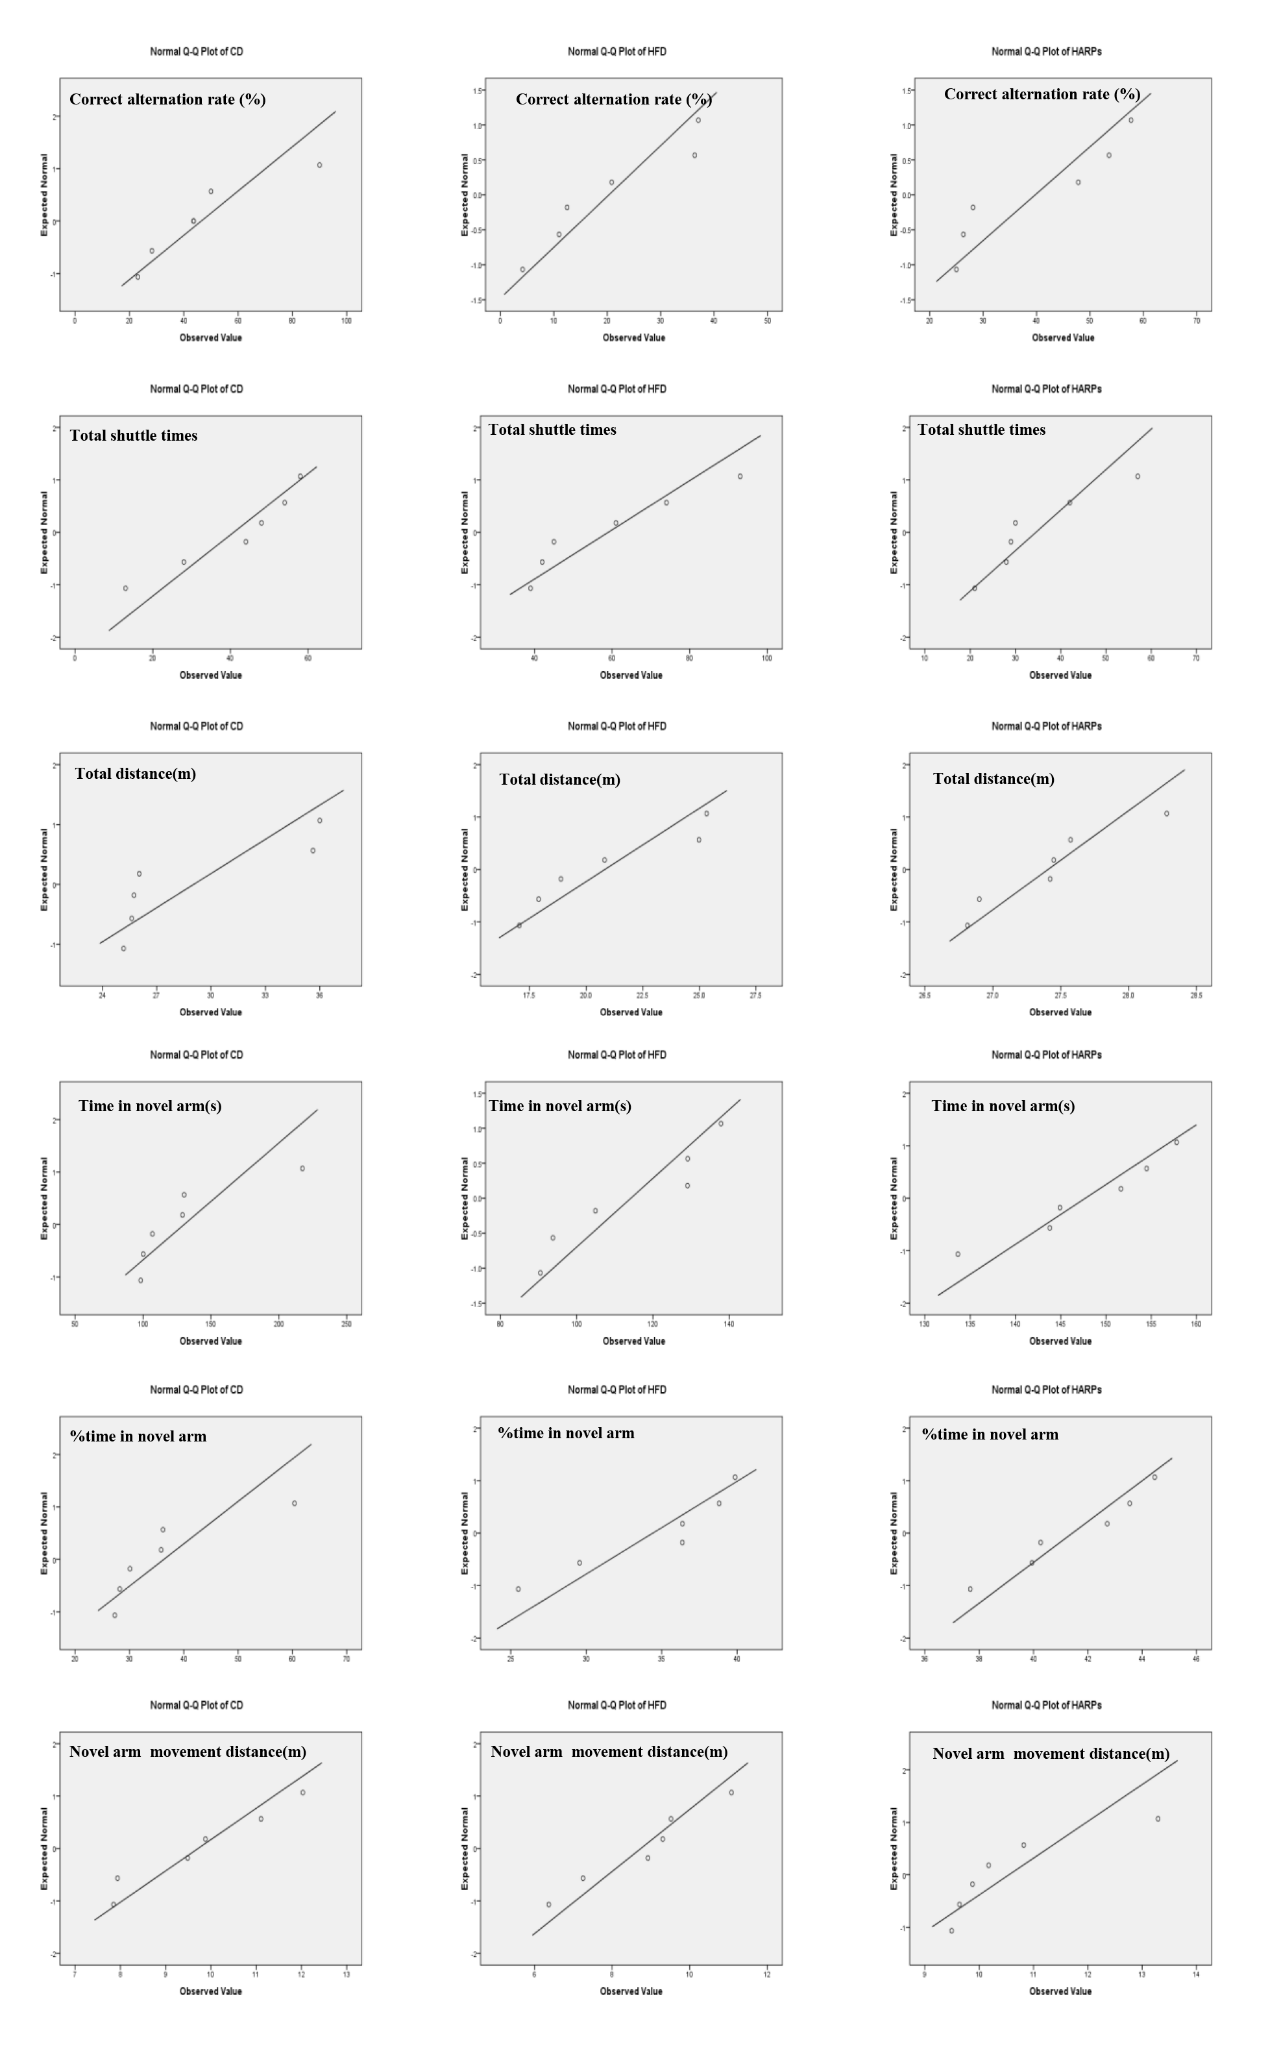
**

**
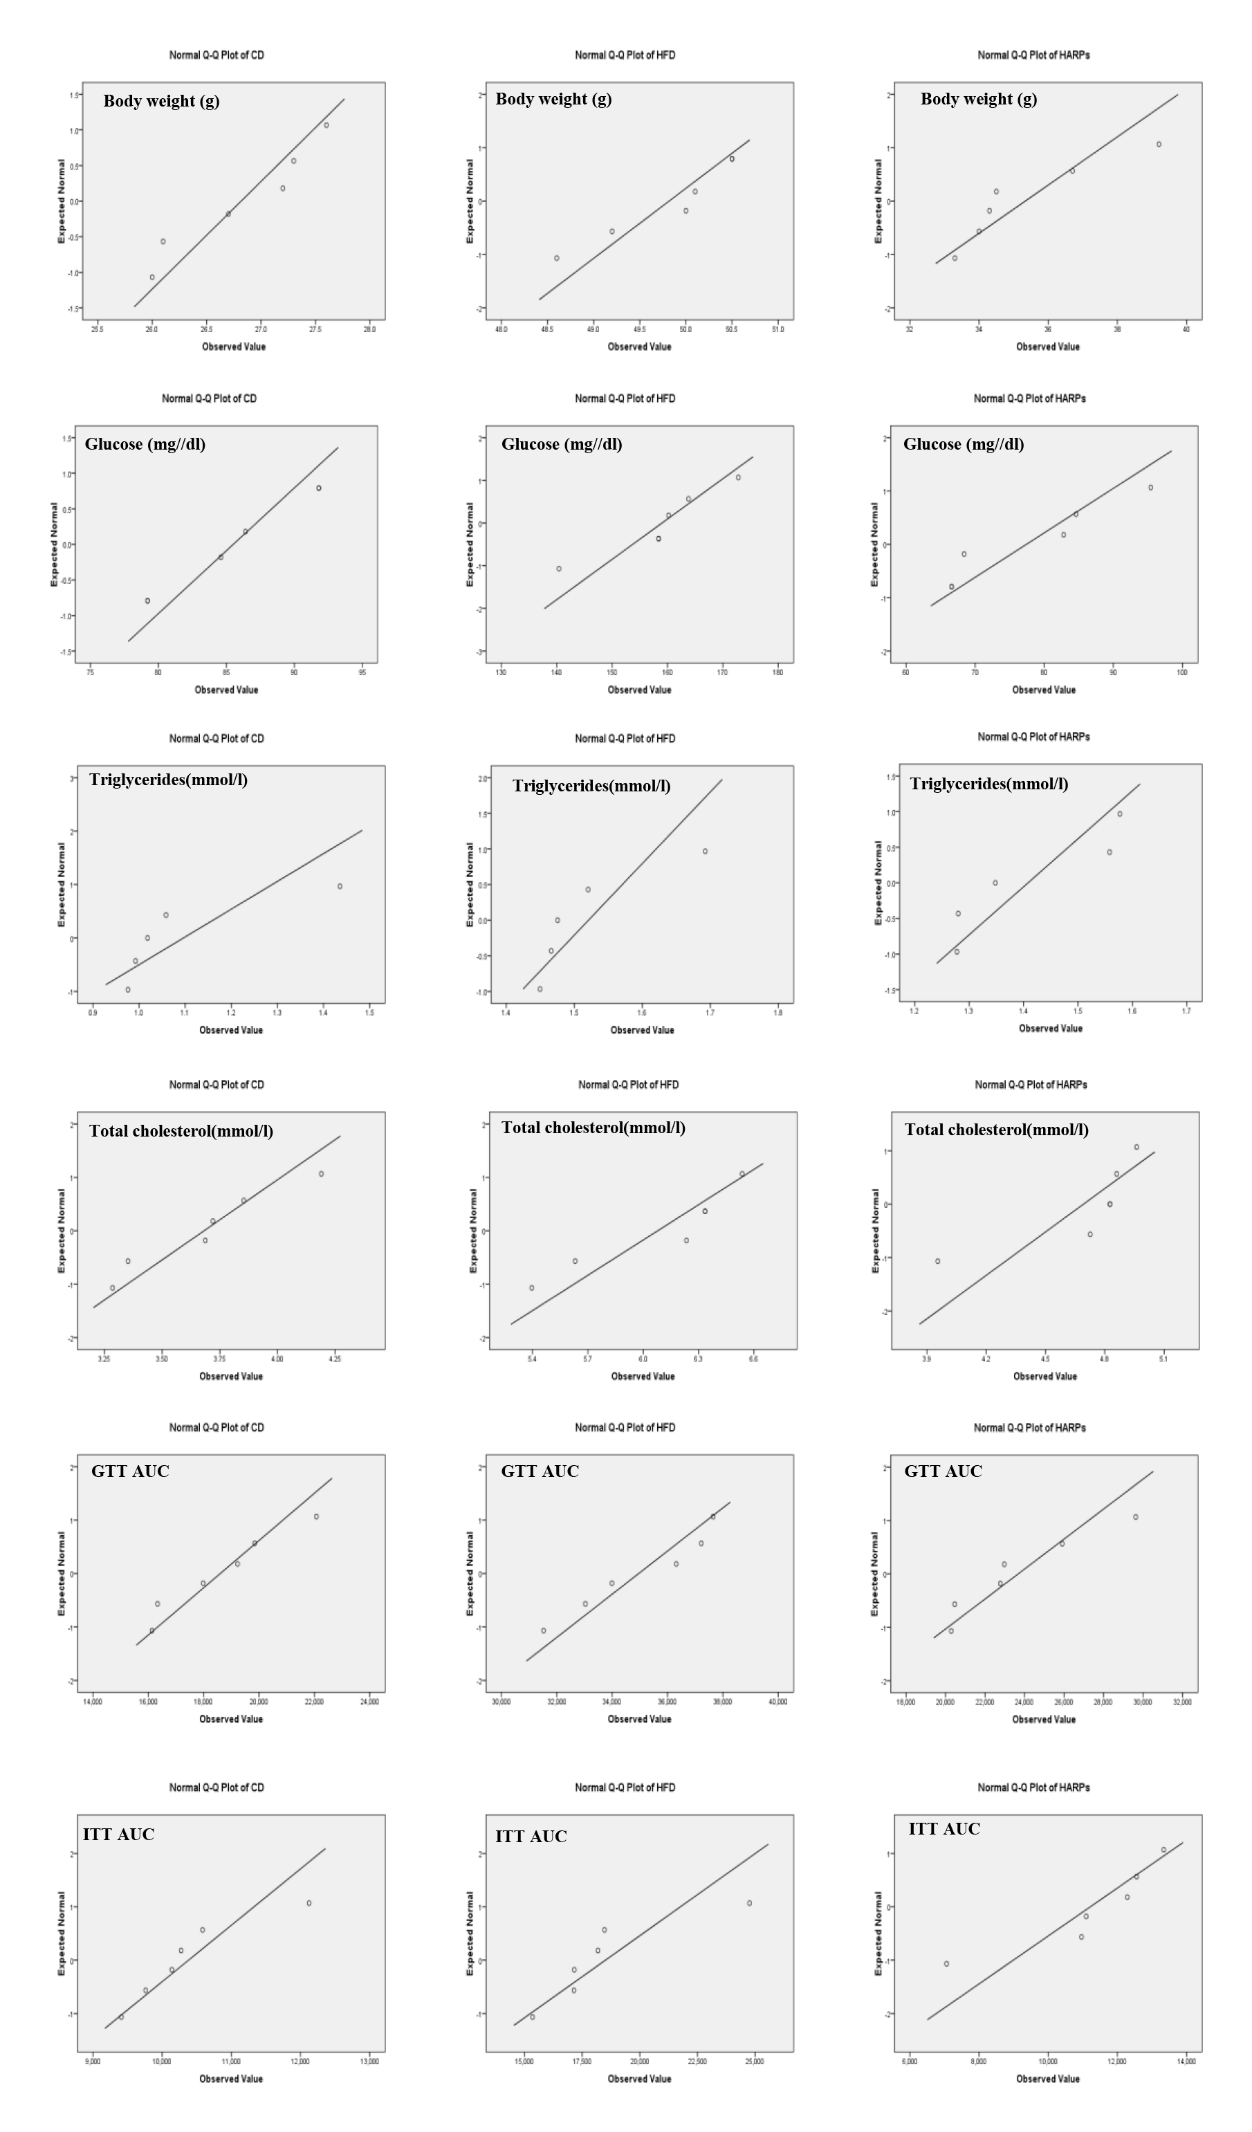
**

**
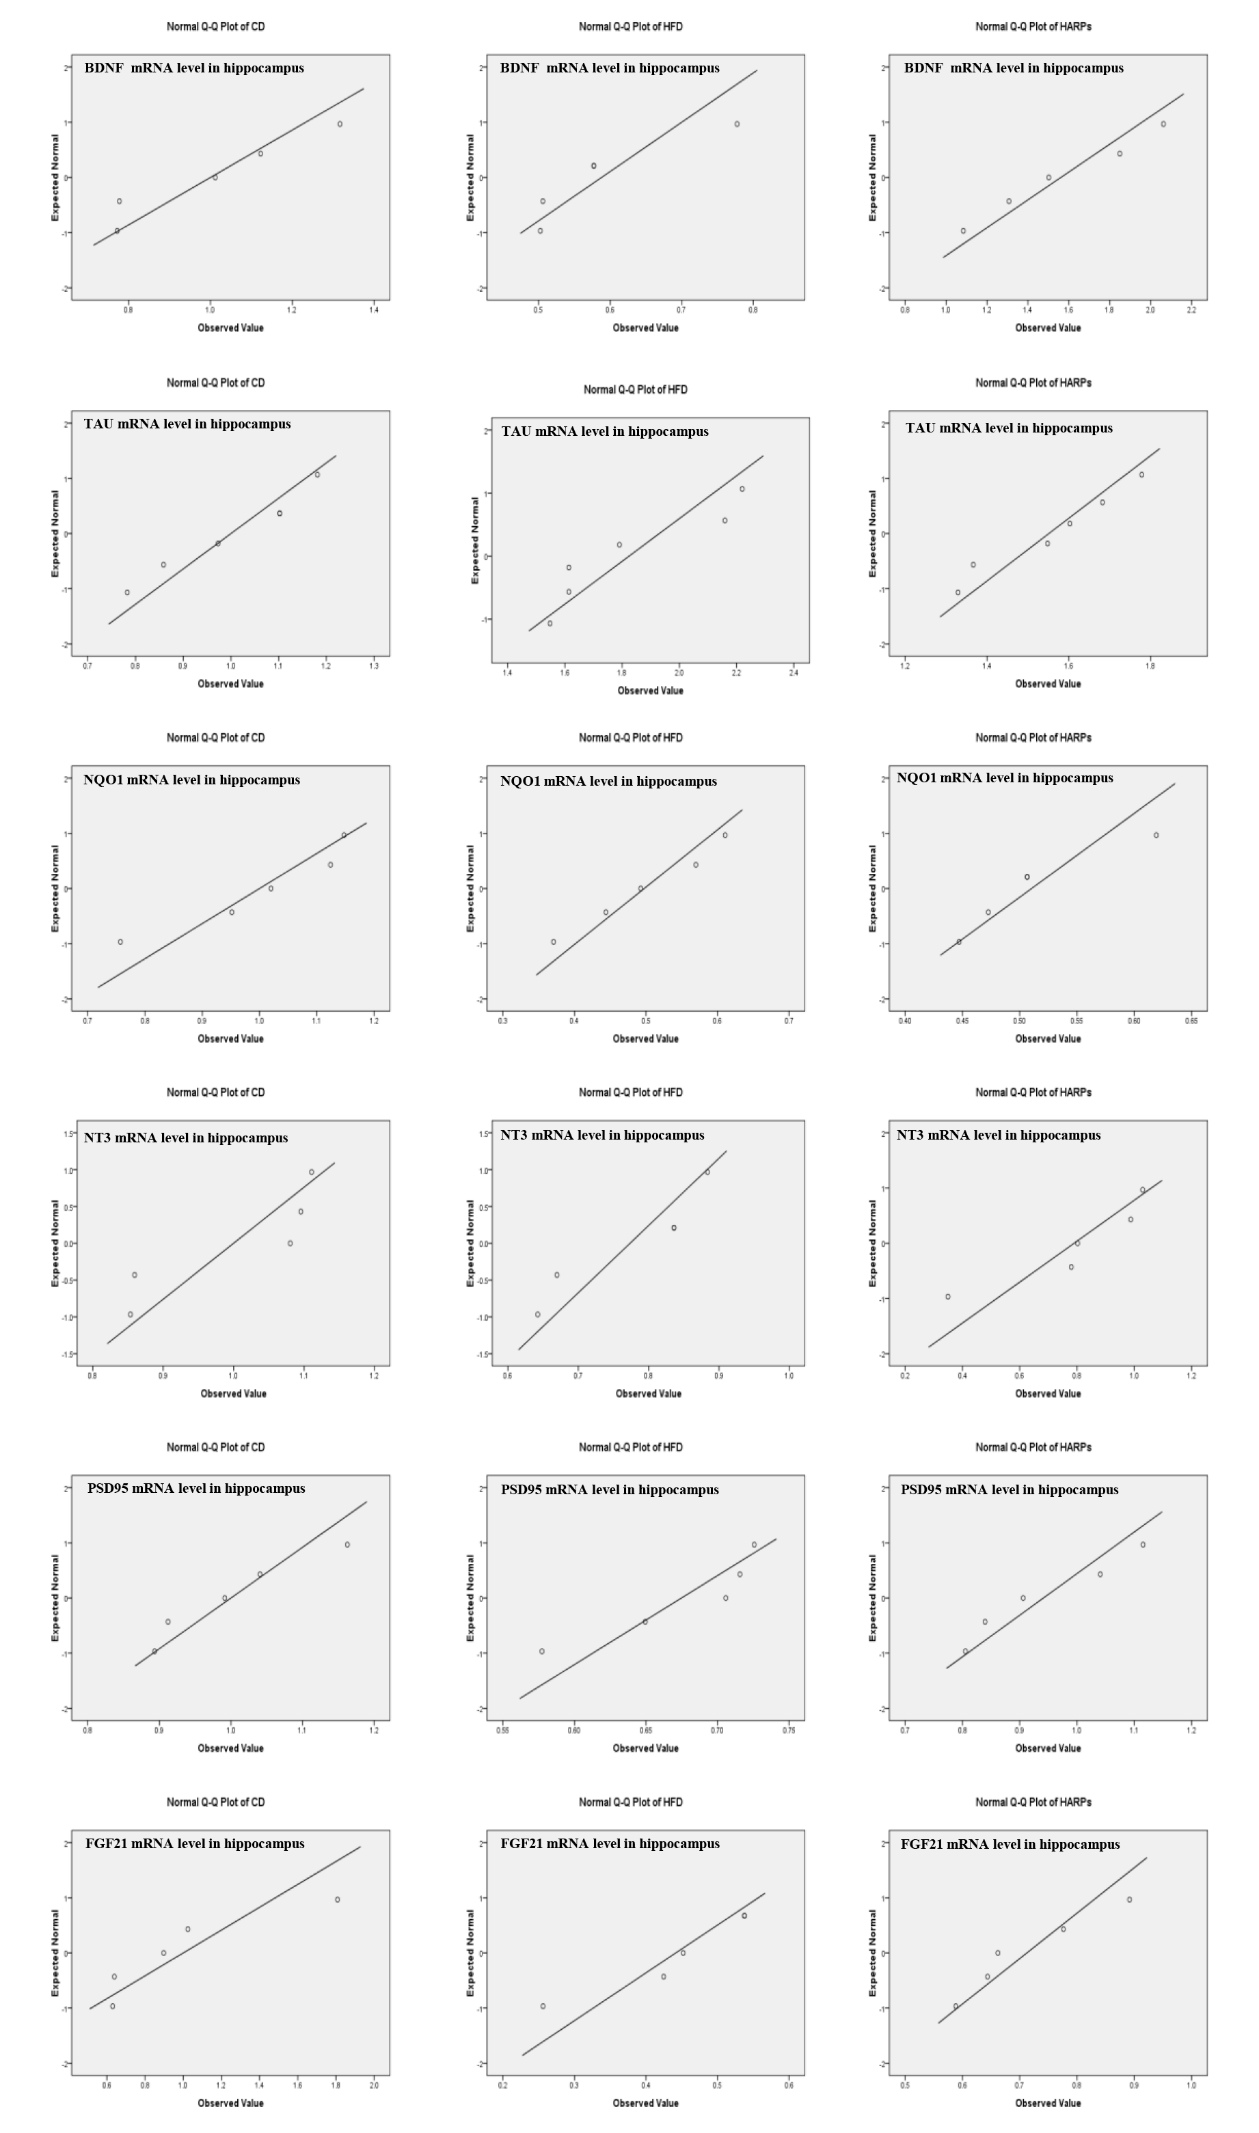
**

**
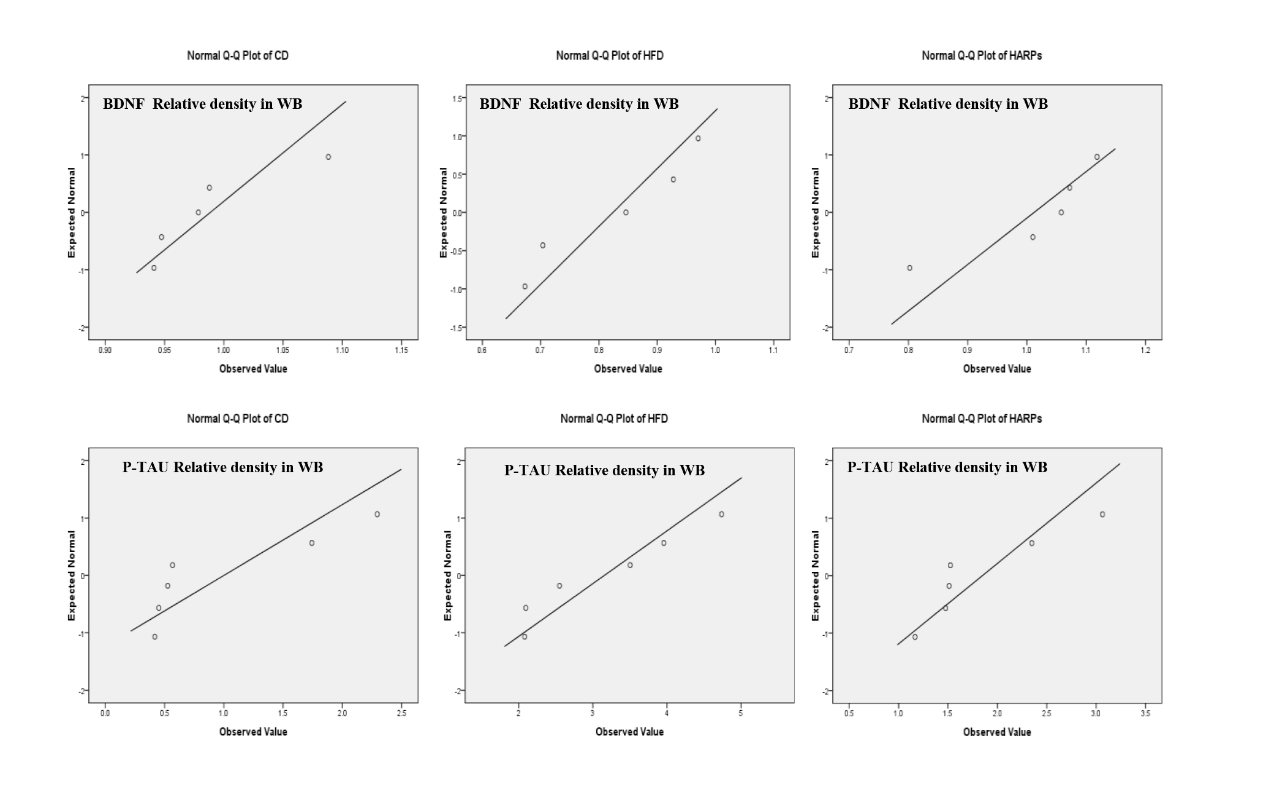
**

**
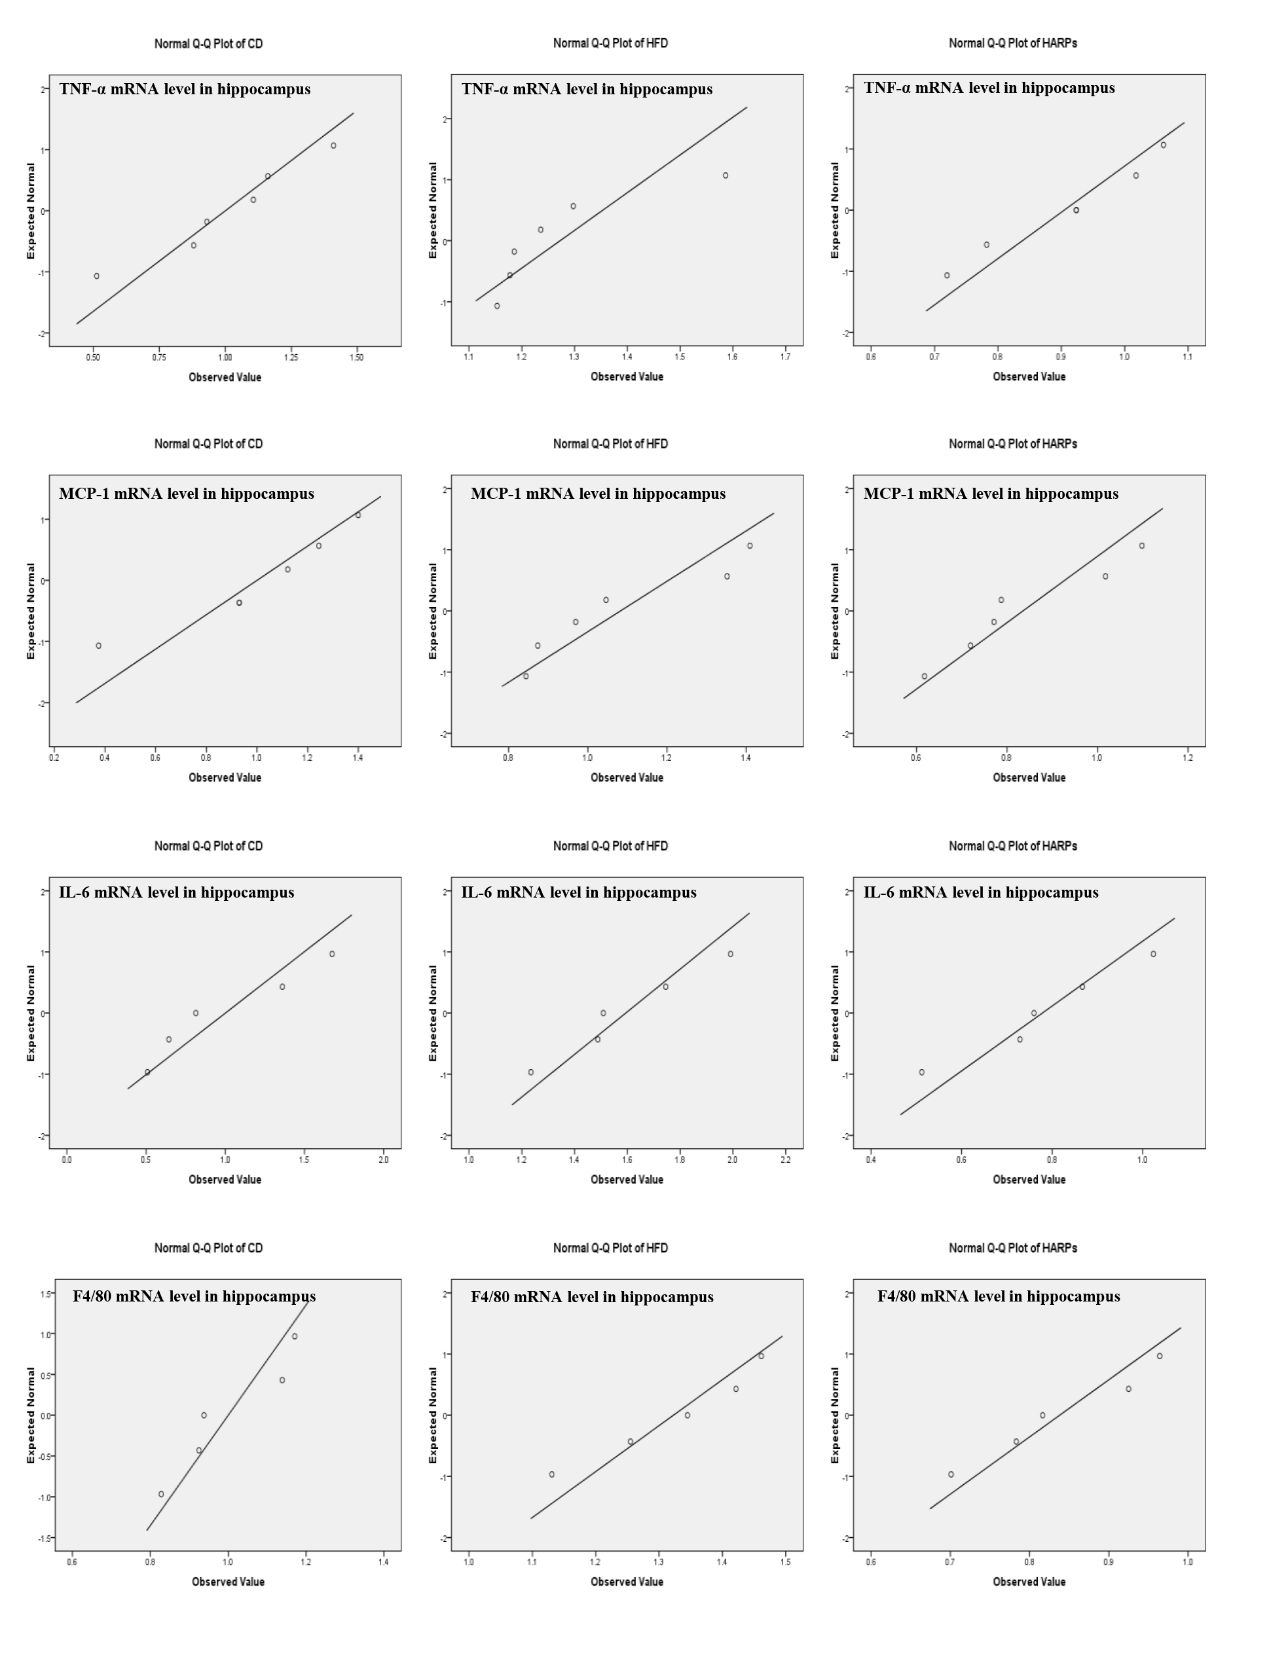
**

**
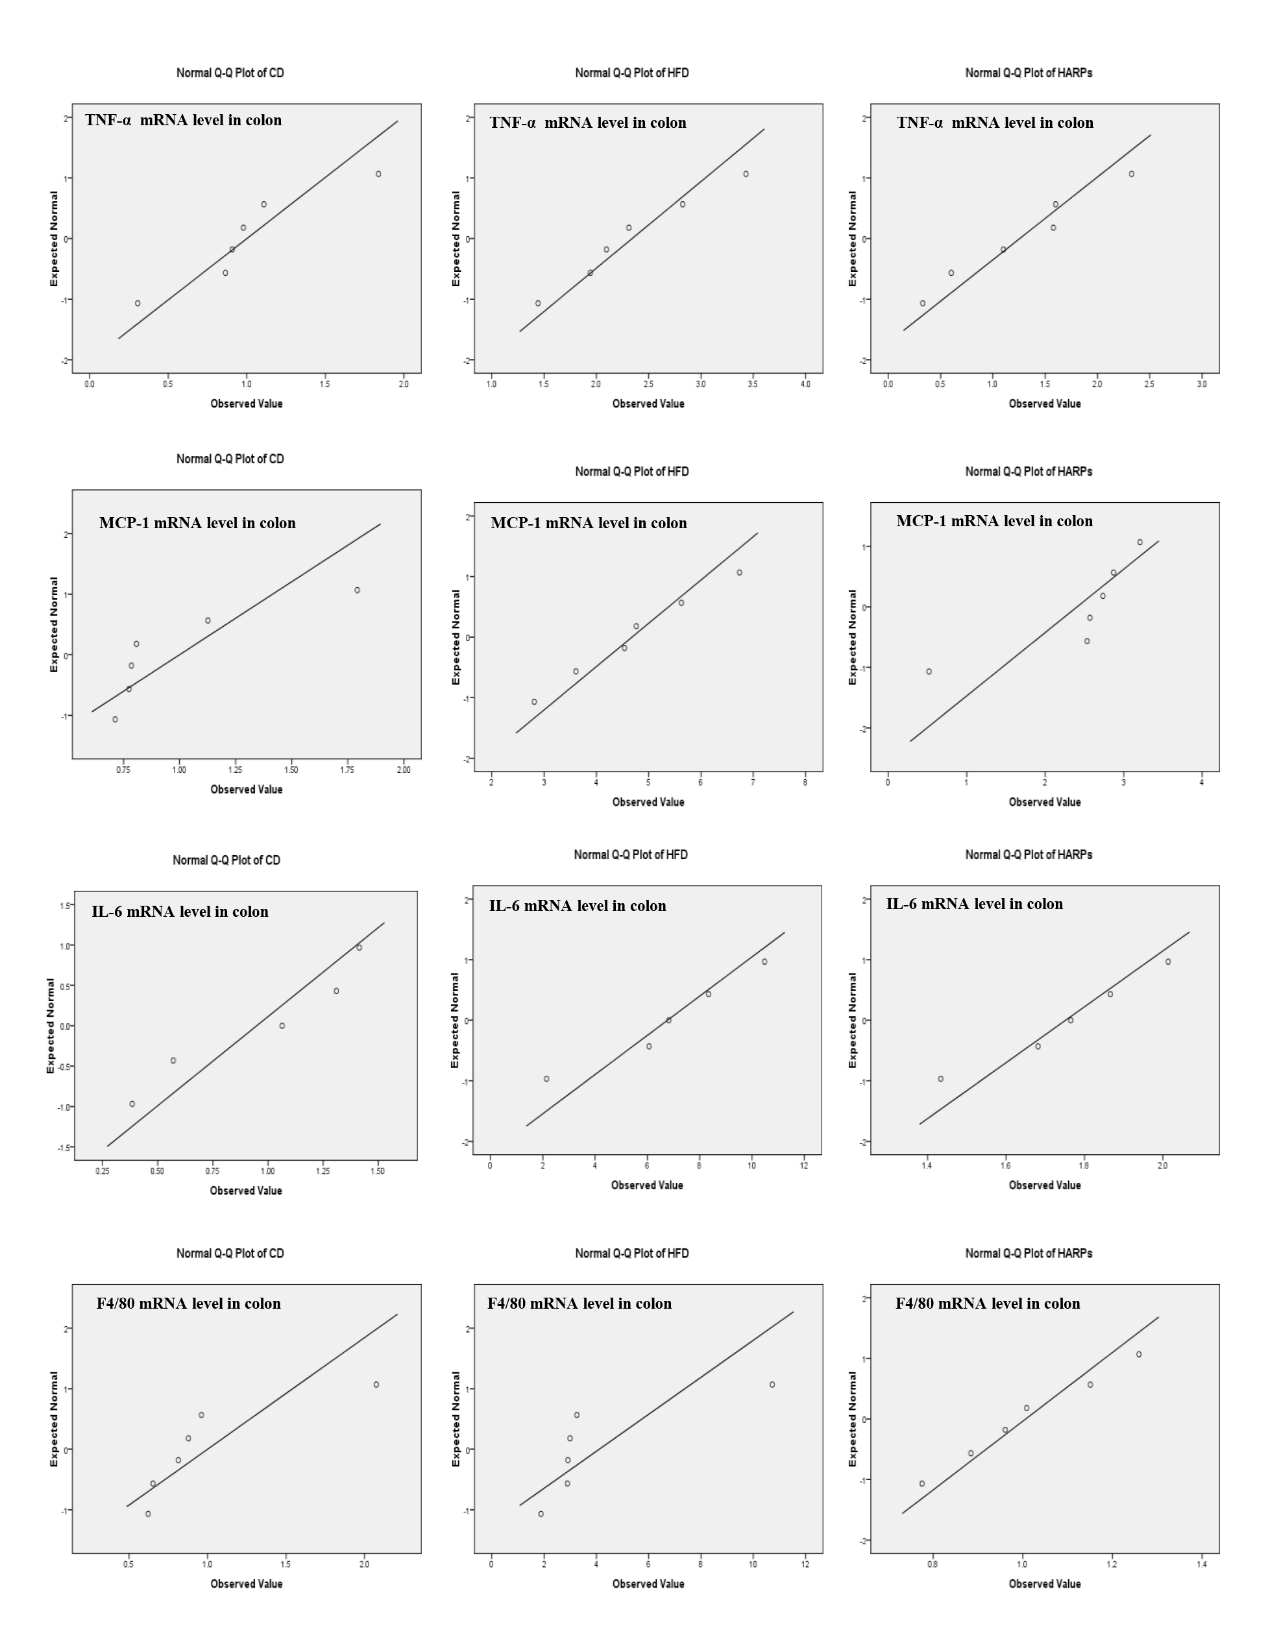
**

**
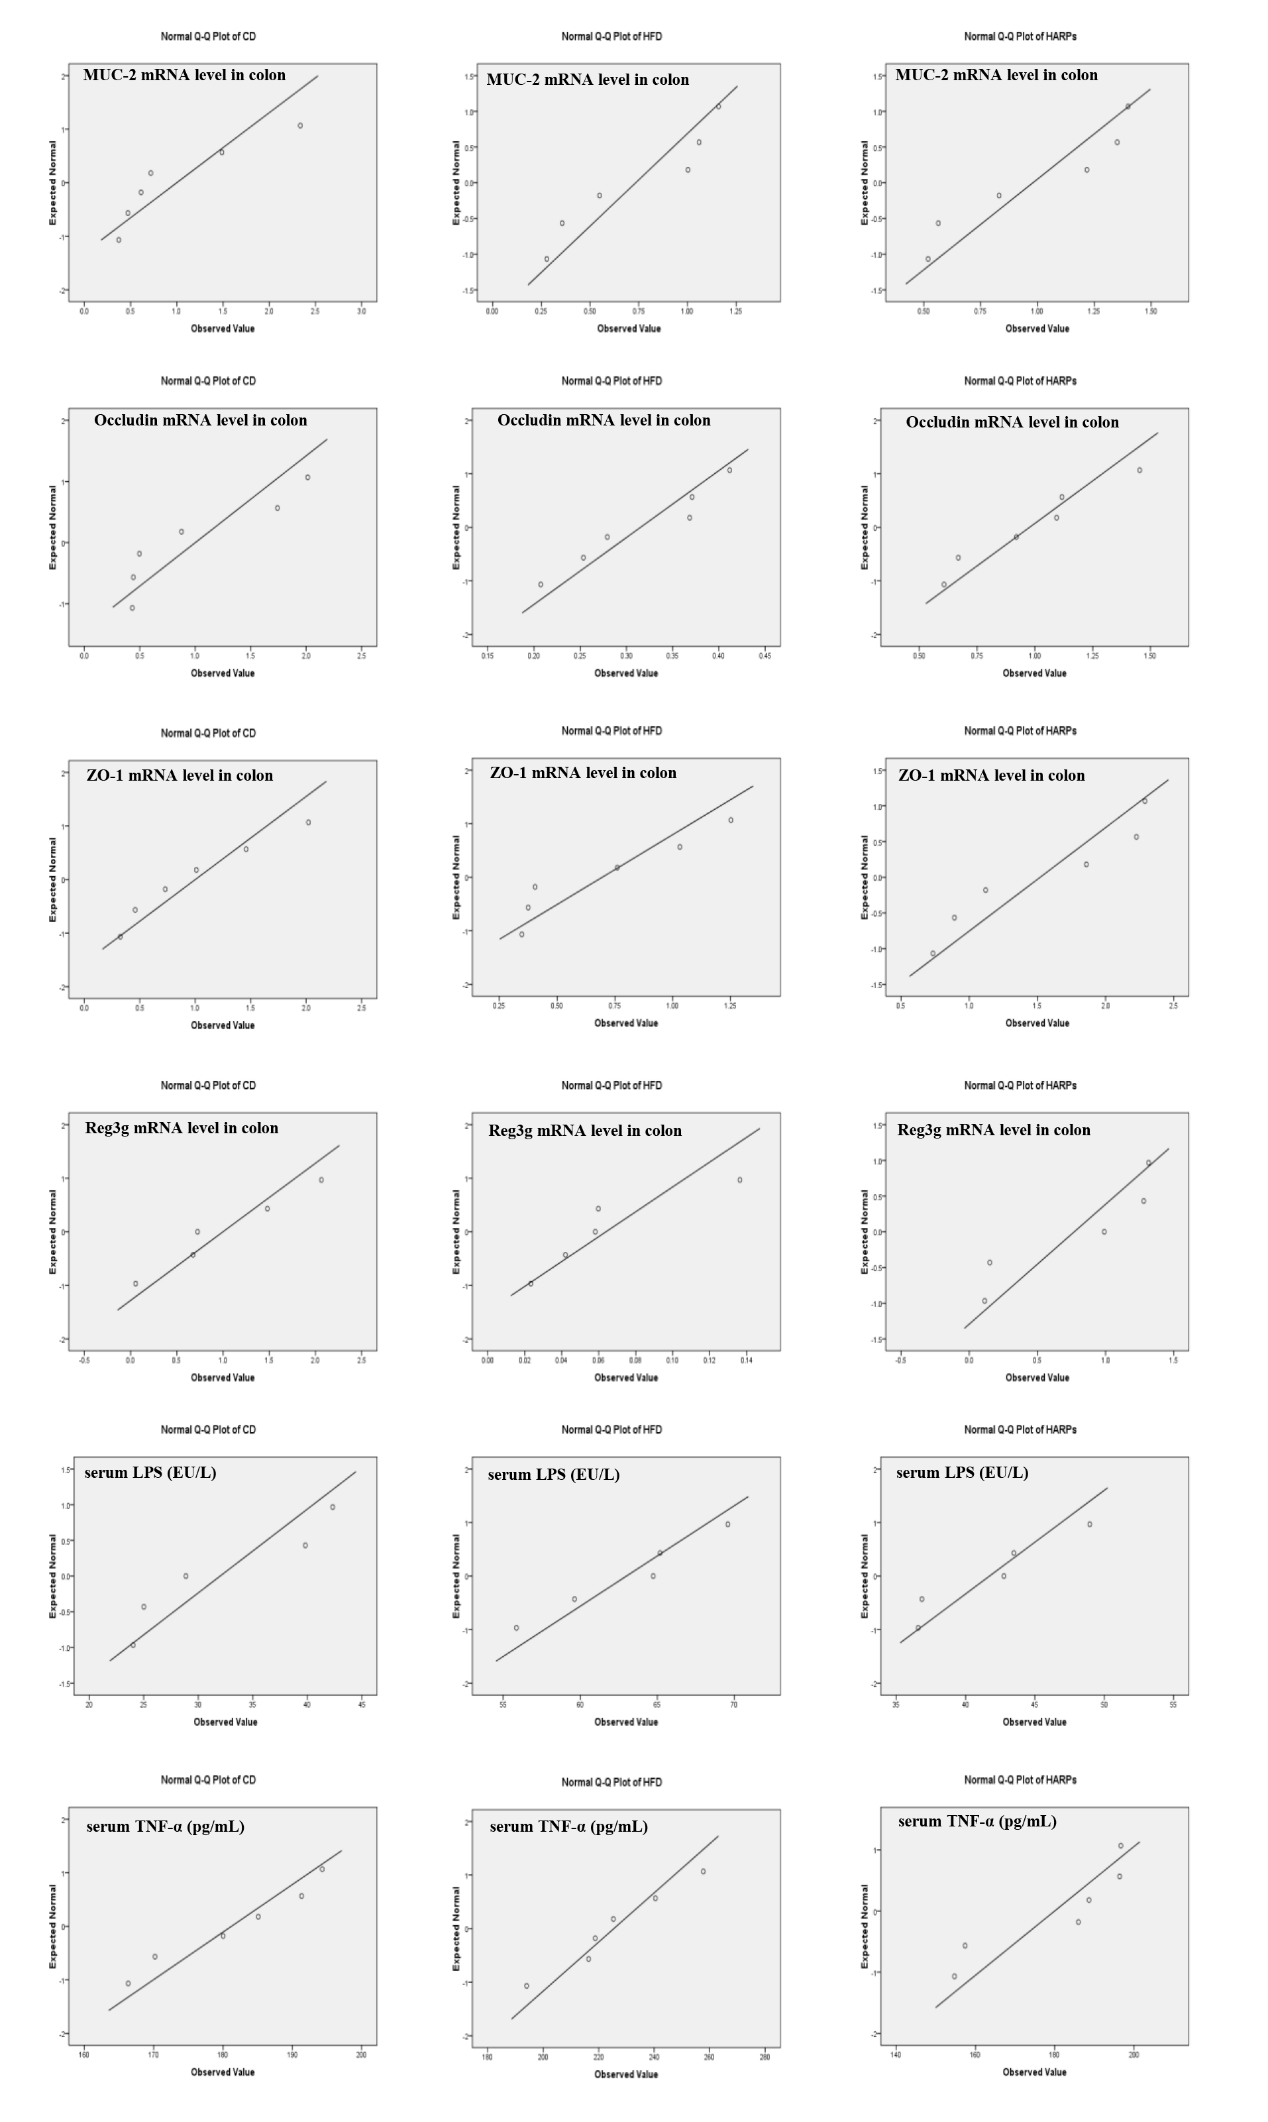
**

**
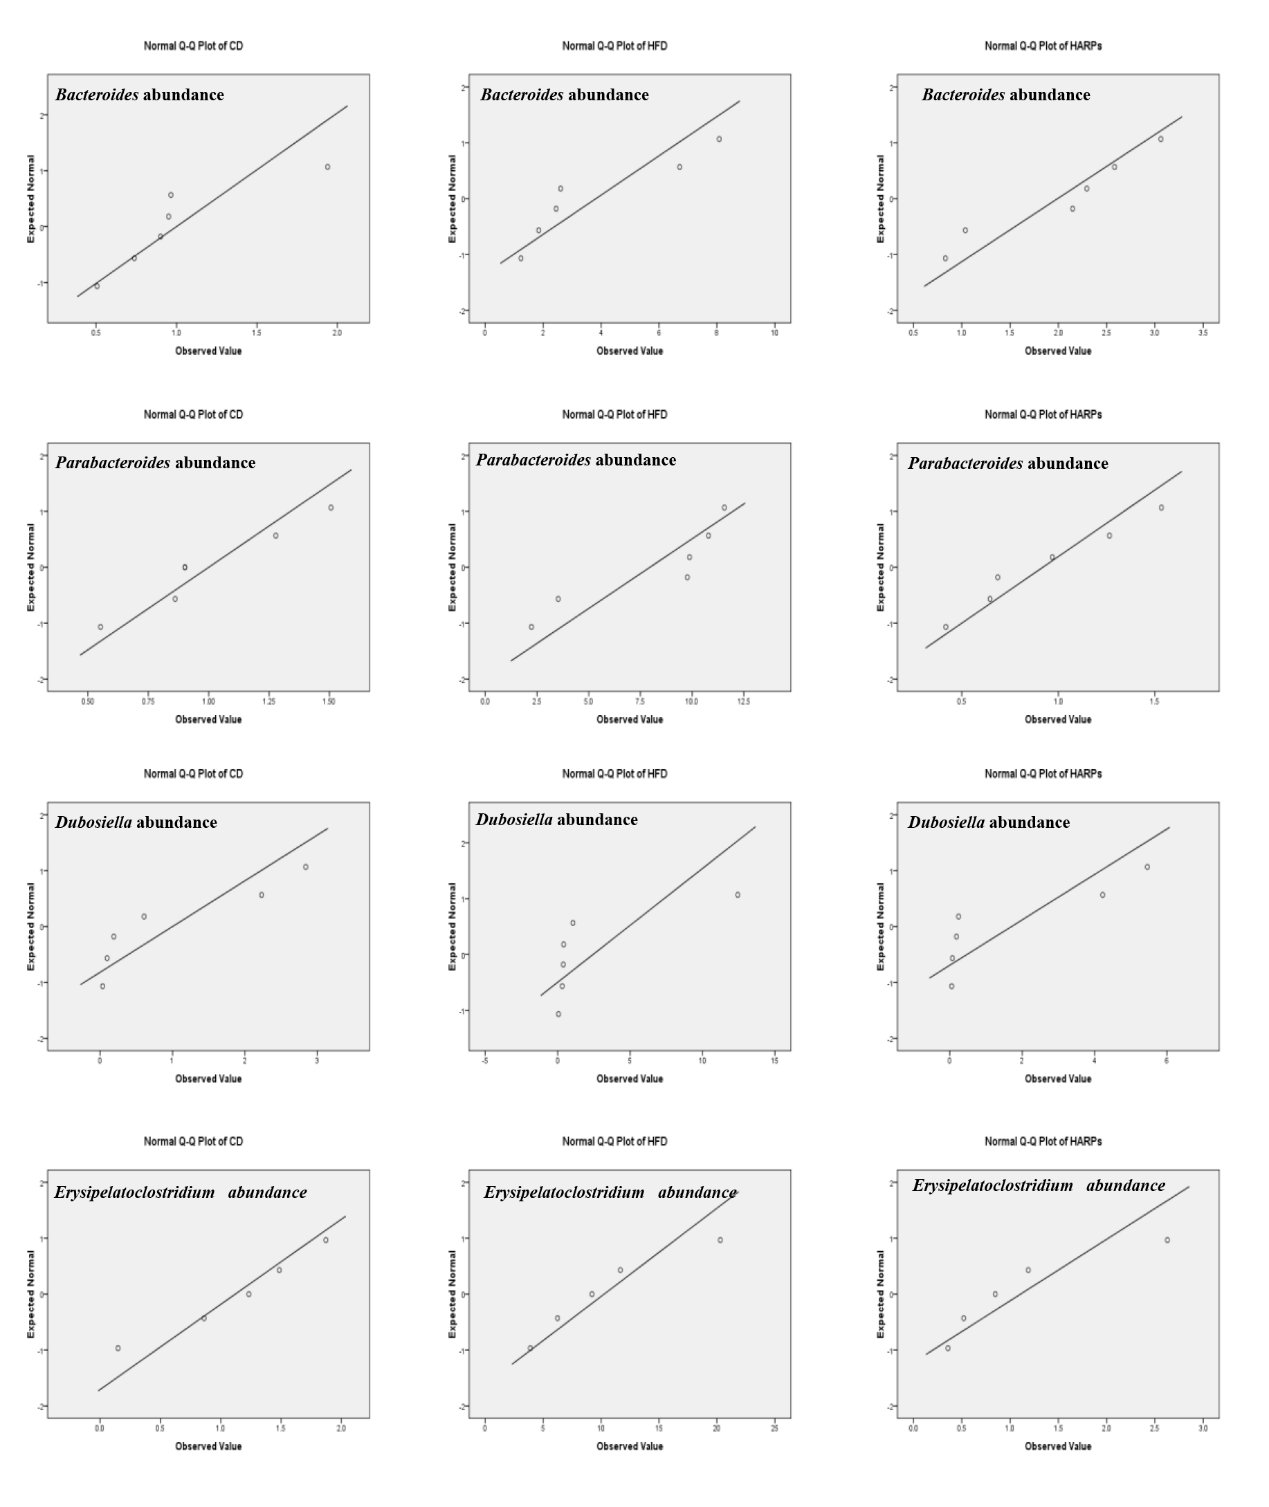
**

**
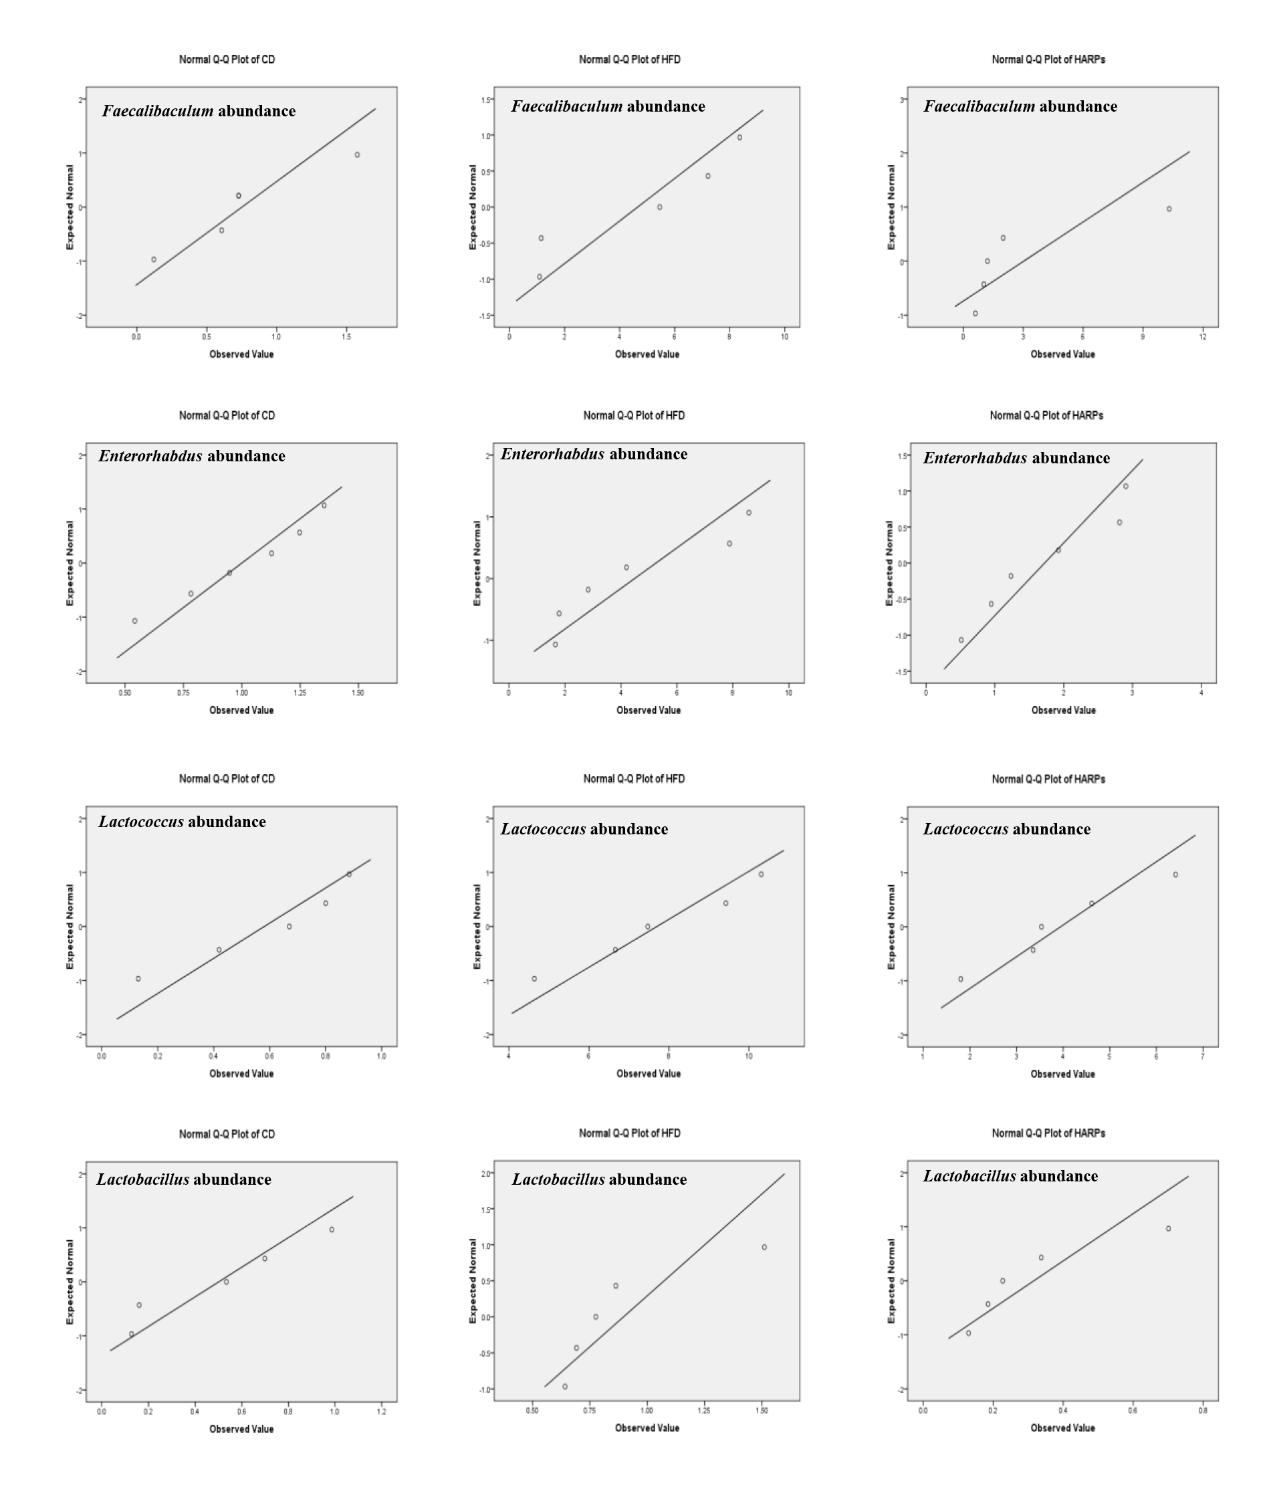
**

**Supplementary Figure 3 |** The assessment of data distribution with Quantile-Quantile plots.

**Supplementary Table 1** | List of specific primers used for RT-PCR gene expression

| Primer | Forward Primer | Reverse Primer |
| --- | --- | --- |
| MCP-1 | TCTGTGCCTGCTGCTCATAG | GCTTGTCCAGGTGGTCCATG |
| F4/80 | ATGTCTGGCTTGCACCTAGTA | CCCCAAAGCGAGTAACAAATTCT |
| TNF-α | CCTCTCTCTAATCAGCCCTCTG | GAGGACCTGGGAGTAGATGAG |
| IL-6 | TTCCATCCAGTTGCCTTCTTG | TATCCTCTGTGAAGTCTCCTCTC |
| BDNF | CTCCGCCATGCAATTTCCACT | GCCTTCATGCAACCGAAGTA |
| Tau | AACCAGATCGGGATGGAGTTC | CAGCGACCGAGGGATGTACT |
| ZO-1 | TGGGAACAGCACACAGTGAC | GCTGGCCCTCCTTTTAACAC |
| Occludin | AGTACATGGCTGCTGATG | CCCACCATCCTCTTGATGTGT |
| Reg3g | CCTCAGGACATCTTGTGTCTGTGCTC | TCCACCTCTGTTGGGTTCATAGCC |
| MUC-2 | CACTGCGATGCCAACGACA | GCCACTAACTGCTTGTTCACCTGTA |
| 18s | TTGACGGAAGGGCACCACCAG | GCACCACCACCCACGGAATCG |

**Supplementary Table 2 |** The result of the major 10 Monosaccharide in the aqueous extract detected by HPLC.

| The name of  Monosaccharide | Retention time | Response factor | Peak area | Content  (μg/ml） | Concentration  (μg/ml） |
| --- | --- | --- | --- | --- | --- |
| Mannose | 13.76 | 161.524 | 7992.320 | 49.481 | 49.481 |
| Ribose | 17.70 | 172.029 | 34.421 | 0.200 | 0.200 |
| Rhamnose | 18.52 | 136.982 | 423.485 | 3.092 | 3.092 |
| Glucuronic acid | 21.55 | 104.499 | 330.352 | 3.161 | 3.161 |
| Galacturonic Acid | 24.78 | 109.192 | 1436.649 | 13.157 | 13.157 |
| Glucose | 27.82 | 253.295 | 17255.907 | 68.126 | 68.126 |
| Galactose | 31.86 | 170.686 | 6788.187 | 39.770 | 39.770 |
| Xylose | 33.23 | 179.966 | 173.581 | 0.965 | 0.965 |
| Arabinose | 34.89 | 184.500 | 1320.564 | 7.158 | 7.158 |
| Fucose | 39.36 | 150.834 | 103.902 | 0.689 | 0.689 |
